# Supplementary material for: Development and Validation of 72-Hour Fluid Balance Trajectory Subphenotypes and Prognosis in Sepsis: A Multicenter Cohort Study
Source: Research Square preprint supplement (doi:10.21203/rs.3.rs-8247018/v1), 2025-12-22
Supplement: Supplementary file 1 [file 0cd6b767c022432ae3db0355.xlsx]

## Sheet: Sheet1
Groups	AvePPClass1	AvePPClass2	AvePPClass3	AvePPClass4	AvePPClass5	AvePPClass6	AvePPClass7	OCCClass1	OCCClass2	OCCClass3	OCCClass4	OCCClass5	OCCClass6	OCCClass7
1	1
2	0.977	0.978						52.1763	36.1352
3	0.9412	0.9574	0.9463					19.0722	37.6047	86.1869
4	0.9301	0.9071	0.9392	0.9425				24.3996	36.657	43.441	77.6171
5	0.9141	0.9031	0.9307	0.9292	0.9395			35.0873	35.0001	72.1899	34.3817	110.044
6	0.915	0.8997	0.9287	0.8666	0.9159	0.9389		36.4999	38.1279	83.5133	37.7471	41.4917	151.334
7	0.9085	0.8975	0.9245	0.8709	0.8794	0.8775	0.943	38.6749	36.0871	82.5489	41.7303	52.1097	39.7187	276.286
