# Supplementary material for: Development and Validation of 72-Hour Fluid Balance Trajectory Subphenotypes and Prognosis in Sepsis: A Multicenter Cohort Study
Source: Research Square preprint supplement (doi:10.21203/rs.3.rs-8247018/v1), 2025-12-22
Supplement: Supplementary file 2 [file b2ef87ab459413a83cd0336b.xlsx]

## Sheet: Sheet1
Variable	Model 1		Model 2		Model 3
	HR (95% CI)	P value	HR (95% CI)	P value	HR (95% CI)	P value
MIMIC-IV
Class 1 vs Class 5	0.36 (0.33, 0.41)	< 0.05	0.34 (0.31, 0.38)	< 0.05	0.47 (0.42, 0.53)	< 0.05
Class 2 vs Class 5	0.72 (0.66, 0.80)	< 0.05	0.68 (0.62, 0.75)	< 0.05	0.83 (0.75, 0.92)	< 0.05
Class 3 vs Class 5	0.54 (0.48, 0.60)	< 0.05	0.50 (0.45, 0.55)	< 0.05	0.68 (0.60, 0.76)	< 0.05
Class 4 vs Class 5	0.40 (0.36, 0.44)	< 0.05	0.38 (0.34, 0.42)	< 0.05	0.49 (0.44, 0.54)	< 0.05
MIMIC-III-CareVue
Class 1 vs Class 5	0.34 (0.25, 0.46)	< 0.05	0.33 (0.24, 0.45)	< 0.05	0.42 (0.30, 0.60)	< 0.05
Class 2 vs Class 5	0.77 (0.61, 0.96)	0.02	0.76 (0.61, 0.96)	0.02	0.82 (0.63, 1.05)	0.12
Class 3 vs Class 5	0.52 (0.40, 0.67)	< 0.05	0.52 (0.40, 0.68)	< 0.05	0.65 (0.48, 0.87)	< 0.05
Class 4 vs Class 5	0.53 (0.42, 0.67)	< 0.05	0.52 (0.41, 0.67)	< 0.05	0.56 (0.43, 0.72)	< 0.05
eICU
Class 1 vs Class 5	0.50 (0.44, 0.57)	< 0.01	0.50 (0.43, 0.57)	< 0.05	0.60 (0.52, 0.69)	< 0.05
Class 2 vs Class 5	0.66 (0.57, 0.76)	< 0.01	0.64 (0.56, 0.74)	< 0.05	0.74 (0.64, 0.85)	< 0.05
Class 3 vs Class 5	0.59 (0.51, 0.68)	< 0.01	0.58 (0.51, 0.67)	< 0.05	0.73 (0.63, 0.84)	< 0.05
Class 4 vs Class 5	0.55 (0.47, 0.65)	< 0.01	0.55 (0.47, 0.65)	< 0.05	0.63 (0.53, 0.75)	< 0.05
