# Supplementary material for: Development and Validation of 72-Hour Fluid Balance Trajectory Subphenotypes and Prognosis in Sepsis: A Multicenter Cohort Study
Source: Research Square preprint supplement (doi:10.21203/rs.3.rs-8247018/v1), 2025-12-22
Supplement: Supplementary file 3 [file ccbde6c4a825c09f595b0c4e.xlsx]

## Sheet: Sheet1
Groups	AIC	BIC	CAIC	SSBIC	Proportion Class1	Proportion Class2	Proportion Class3	Proportion Class4	Proportion Class5	Proportion Class6	Proportion Class7
1	2.47678e+06	2.47682e+06	2.47683e+06	2.47681e+06	1
2	2.37091e+06	2.371e+06	2.37101e+06	2.37098e+06	0.4468	0.5532
3	2.34633e+06	2.34648e+06	2.34649e+06	2.34644e+06	0.4584	0.3754	0.1662
4	2.33065e+06	2.33085e+06	2.33087e+06	2.33079e+06	0.3539	0.2105	0.2626	0.173
5	2.31685e+06	2.31711e+06	2.31713e+06	2.31703e+06	0.2347	0.2098	0.1579	0.2749	0.1226
6	2.30997e+06	2.31028e+06	2.31031e+06	2.31019e+06	0.2301	0.1918	0.1349	0.1439	0.2078	0.0914
7	2.30468e+06	2.30505e+06	2.30509e+06	2.30494e+06	0.2054	0.1975	0.1304	0.1358	0.1232	0.1522	0.0555
