# Supplementary material for: Development and Validation of 72-Hour Fluid Balance Trajectory Subphenotypes and Prognosis in Sepsis: A Multicenter Cohort Study
Source: Research Square preprint supplement (doi:10.21203/rs.3.rs-8247018/v1), 2025-12-22
Supplement: Supplementary file 4 [file e08e086066d53b1c584558ad.xlsx]

## Sheet: Sheet2
Variable	Model 1		Model 2		Model 3		IPTW-Model 3
	HR (95% CI)	P value	HR (95% CI)	P value	HR (95% CI)	P value	HR (95% CI)	P value
MIMIC-IV
Class 1 vs Class 5	0.36 (0.33–0.41)	< 0.05	0.34 (0.31–0.38)	< 0.05	0.50 (0.44–0.56)	< 0.05	0.43 (0.36–0.52)	< 0.05
Class 2 vs Class 5	0.72 (0.66–0.80)	< 0.05	0.68 (0.62–0.75)	< 0.05	0.87 (0.78–0.96)	< 0.05	0.78 (0.68–0.91)	< 0.05
Class 3 vs Class 5	0.54 (0.48–0.60)	< 0.05	0.50 (0.45–0.55)	< 0.05	0.73 (0.64–0.83)	< 0.05	0.72 (0.61–0.87)	< 0.05
Class 4 vs Class 5	0.40 (0.36–0.44)	< 0.05	0.38 (0.34–0.42)	< 0.05	0.51 (0.46–0.57)	< 0.05	0.47 (0.40–0.55)	< 0.05
MIMIC-III-CareVue
Class 1 vs Class 5	0.34 (0.25–0.46)	< 0.05	0.33 (0.24–0.45)	< 0.05	0.43 (0.31–0.61)	< 0.05	0.41 (0.26–0.66)	< 0.05
Class 2 vs Class 5	0.77 (0.61–0.96)	< 0.05	0.76 (0.61–0.96)	< 0.05	0.89 (0.68–1.15)	0.37	0.88 (0.60–1.30)	0.53
Class 3 vs Class 5	0.52 (0.40–0.67)	< 0.05	0.52 (0.40–0.68)	< 0.05	0.70 (0.52–0.95)	< 0.05	0.57 (0.38–0.87)	< 0.05
Class 4 vs Class 5	0.53 (0.42–0.67)	< 0.05	0.52 (0.41–0.67)	< 0.05	0.60 (0.47–0.78)	< 0.05	0.53 (0.35–0.80)	< 0.05
eICU
Class 1 vs Class 5	0.36 (0.33–0.41)	< 0.01	0.34 (0.31–0.38)	< 0.05	0.50 (0.44–0.56)	< 0.05	0.58 (0.47–0.71)	< 0.05
Class 2 vs Class 5	0.72 (0.66–0.80)	< 0.01	0.68 (0.62–0.75)	< 0.05	0.87 (0.78–0.96)	< 0.05	0.71 (0.57–0.89)	< 0.05
Class 3 vs Class 5	0.54 (0.48–0.60)	< 0.01	0.50 (0.45–0.55)	< 0.05	0.73 (0.64–0.83)	< 0.05	0.69 (0.56–0.85)	< 0.05
Class 4 vs Class 5	0.40 (0.36–0.44)	< 0.01	0.38 (0.34–0.42)	< 0.05	0.51 (0.46–0.57)	< 0.05	0.65 (0.51–0.83)	< 0.05
