# Supplementary material for: Development and Validation of 72-Hour Fluid Balance Trajectory Subphenotypes and Prognosis in Sepsis: A Multicenter Cohort Study
Source: Research Square preprint supplement (doi:10.21203/rs.3.rs-8247018/v1), 2025-12-22
Supplement: Supplementary file 5 [file fbbb008e66f41418ad9eb7b5.xlsx]

## Sheet: Sheet1
Variable	Overall	Class1	Class2	Class3	Class4	Class5	p-value
	(N=16069)	(N=3772)	(N=3372)	(N=2538)	(N=4417)	(N=1970)
Age, y	67.00 [56.00, 78.00]	68.00 [57.00, 78.00]	67.00 [56.00, 78.00]	68.00 [57.00, 78.00]	67.00 [56.00, 78.00]	66.00 [53.00, 77.00]	<0.001
Gender (Female), (%)	6880 (42.82%)	1622 (43.00%)	1404 (41.64%)	978 (38.53%)	1924 (43.56%)	952 (48.32%)	<0.001
Race, (%)
White	10399 (64.71%)	2531 (67.10%)	2102 (62.34%)	1609 (63.40%)	2924 (66.20%)	1233 (62.59%)	<0.001
Black	1631 (10.15%)	366 (9.70%)	345 (10.23%)	322 (12.69%)	391 (8.85%)	207 (10.51%)
Asian	450 (2.80%)	94 (2.49%)	93 (2.76%)	25 (0.99%)	164 (3.71%)	74 (3.76%)
Other	3589 (22.33%)	781 (20.71%)	832 (24.67%)	582 (22.93%)	938 (21.24%)	456 (23.15%)
ICUType, (%)
Medical ICU	6939 (43.18%)	1482 (39.29%)	1457 (43.21%)	968 (38.14%)	2021 (45.76%)	1011 (51.32%)	<0.001
Surgical ICU	4202 (26.15%)	775 (20.55%)	1095 (32.47%)	756 (29.79%)	962 (21.78%)	614 (31.17%)
CCU	3812 (23.72%)	1289 (34.17%)	417 (12.37%)	556 (21.91%)	1249 (28.28%)	301 (15.28%)
Neuro ICU	884 (5.50%)	167 (4.43%)	324 (9.61%)	221 (8.71%)	141 (3.19%)	31 (1.57%)
Other ICU	232 (1.44%)	59 (1.56%)	79 (2.34%)	37 (1.46%)	44 (1.00%)	13 (0.66%)
Severity of illness
SOFA	6.00 [4.00, 9.00]	5.00 [3.00, 8.00]	6.00 [4.00, 9.00]	5.00 [3.00, 8.00]	7.00 [4.00, 9.00]	9.00 [6.00, 12.00]	<0.001
OASIS	35.00 [30.00, 41.00]	33.00 [28.00, 38.00]	36.00 [31.00, 42.00]	34.00 [29.00, 40.00]	36.00 [31.00, 42.00]	40.00 [34.00, 47.00]	<0.001
GCS	15.00 [13.00, 15.00]	15.00 [13.00, 15.00]	15.00 [12.00, 15.00]	15.00 [13.00, 15.00]	15.00 [13.00, 15.00]	15.00 [13.00, 15.00]	<0.001
Charlson	5.00 [3.00, 7.00]	5.00 [3.00, 7.00]	5.00 [3.00, 8.00]	6.00 [4.00, 8.00]	5.00 [3.00, 7.00]	5.00 [3.00, 8.00]	<0.001
Infection
Lung, (%)	4580 (28.50%)	1150 (30.49%)	1002 (29.72%)	726 (28.61%)	1100 (24.90%)	602 (30.56%)	<0.001
Gi, (%)	1685 (10.49%)	231 (6.12%)	356 (10.56%)	197 (7.76%)	493 (11.16%)	408 (20.71%)	<0.001
Gu, (%)	3377 (21.02%)	720 (19.09%)	748 (22.18%)	584 (23.01%)	871 (19.72%)	454 (23.05%)	<0.001
Other, (%)	5390 (33.54%)	973 (25.80%)	1164 (34.52%)	708 (27.90%)	1557 (35.25%)	988 (50.15%)	<0.001
Comorbidities
Hypertension, (%)	6249 (38.89%)	1498 (39.71%)	1276 (37.84%)	1022 (40.27%)	1801 (40.77%)	652 (33.10%)	<0.001
Diabetes, (%)	4740 (29.50%)	1182 (31.34%)	1021 (30.28%)	937 (36.92%)	1128 (25.54%)	472 (23.96%)	<0.001
COPD, (%)	1238 (7.70%)	374 (9.92%)	254 (7.53%)	238 (9.38%)	261 (5.91%)	111 (5.63%)	<0.001
HF, (%)	5519 (34.35%)	1663 (44.09%)	1003 (29.74%)	1013 (39.91%)	1305 (29.54%)	535 (27.16%)	<0.001
Stroke, (%)	1723 (10.72%)	344 (9.12%)	521 (15.45%)	417 (16.43%)	311 (7.04%)	130 (6.60%)	<0.001
Vital signs
MAP, mmHg	57.00 [50.00, 64.00]	59.00 [52.00, 65.00]	57.00 [50.00, 65.00]	59.00 [52.00, 67.00]	55.00 [49.00, 61.00]	53.00 [45.00, 60.00]	<0.001
Heart rate, beats/min	106.00 [92.00, 122.00]	103.00 [90.00, 117.00]	106.00 [92.00, 122.00]	102.00 [89.00, 117.00]	108.00 [94.00, 123.00]	114.00 [98.00, 131.00]	<0.001
Respiratory rate, times/min	28.00 [24.00, 33.00]	28.00 [25.00, 33.00]	28.00 [24.00, 33.00]	28.00 [24.00, 32.00]	28.00 [24.00, 33.00]	30.00 [25.00, 35.00]	<0.001
Temperature, °C	37.44 [37.00, 38.06]	37.33 [37.00, 37.89]	37.50 [37.06, 38.17]	37.39 [37.00, 37.94]	37.50 [37.06, 38.17]	37.44 [37.00, 38.11]	<0.001
Laboratory
Hb, g/dL	10.30 [8.70, 12.00]	10.40 [8.80, 12.10]	10.40 [8.80, 12.10]	10.90 [9.20, 12.60]	10.00 [8.50, 11.70]	10.00 [8.40, 11.70]	<0.001
Wbc, 10^9/L	11.80 [8.10, 16.40]	11.10 [8.00, 15.40]	11.80 [8.30, 16.30]	11.60 [8.40, 15.40]	12.20 [8.10, 17.20]	12.20 [7.50, 18.50]	<0.001
Plt, 10^9/L	188.00 [129.00, 259.00]	192.00 [137.00, 262.00]	194.00 [130.00, 262.00]	203.00 [150.00, 262.00]	175.00 [121.00, 252.00]	171.00 [107.00, 255.00]	<0.001
Cre, mg/dL	1.10 [0.80, 1.80]	1.00 [0.70, 1.50]	1.10 [0.80, 1.90]	1.20 [0.80, 2.00]	1.00 [0.70, 1.50]	1.40 [0.80, 2.70]	<0.001
Lactate,mmol/L	1.80 [1.20, 2.80]	1.60 [1.10, 2.40]	1.70 [1.20, 2.60]	1.50 [1.10, 2.20]	2.00 [1.30, 3.20]	2.40 [1.50, 4.00]	<0.001
PH	7.37 [7.30, 7.42]	7.38 [7.32, 7.43]	7.37 [7.30, 7.42]	7.38 [7.31, 7.43]	7.36 [7.29, 7.42]	7.33 [7.24, 7.40]	<0.001
PO2,mmHg	115.00 [76.00, 214.00]	112.00 [75.00, 210.00]	106.00 [73.00, 180.00]	107.00 [73.00, 173.00]	142.00 [83.00, 285.25]	109.00 [73.00, 196.75]	<0.001
PCO2,mmHg	40.00 [34.00, 48.00]	41.00 [35.00, 49.00]	40.00 [34.00, 48.00]	42.00 [36.00, 51.00]	40.00 [34.00, 47.00]	39.00 [32.00, 45.00]	<0.001
K, mmol/L	4.20 [3.70, 4.70]	4.15 [3.70, 4.70]	4.10 [3.70, 4.60]	4.20 [3.80, 4.60]	4.10 [3.70, 4.70]	4.10 [3.60, 4.80]	<0.05
Na, mmol/L	138.00 [135.00, 141.00]	138.00 [135.00, 141.00]	138.00 [135.00, 142.00]	138.00 [135.00, 141.00]	138.00 [135.00, 141.00]	138.00 [134.00, 141.00]	<0.001
Cl, mmol/L	104.00 [99.00, 108.00]	103.00 [99.00, 107.00]	103.00 [99.00, 108.00]	102.00 [98.00, 106.00]	106.00 [101.00, 109.00]	105.00 [99.00, 110.00]	<0.001
Ca, mg/dL	8.30 [7.70, 8.80]	8.40 [7.90, 8.80]	8.30 [7.80, 8.80]	8.50 [8.00, 8.90]	8.10 [7.60, 8.60]	7.90 [7.30, 8.60]	<0.001
Interventions
Mechanical ventilation, (%)	10316 (64.20%)	2185 (57.93%)	2079 (61.65%)	1477 (58.20%)	3150 (71.32%)	1425 (72.34%)	<0.001
RRT, (%)	695 (4.33%)	17 (0.45%)	160 (4.74%)	118 (4.65%)	65 (1.47%)	335 (17.01%)	<0.001
Vaso, (%)	8310 (51.71%)	1582 (41.94%)	1559 (46.23%)	906 (35.70%)	2866 (64.89%)	1397 (70.91%)	<0.001
Outcome
Day28los, (d)	28.00 [28.00, 28.00]	28.00 [28.00, 28.00]	28.00 [18.03, 28.00]	28.00 [28.00, 28.00]	28.00 [28.00, 28.00]	28.00 [12.44, 28.00]	<0.001
Day28outcome, (%)	3763 (23.42%)	624 (16.54%)	1011 (29.98%)	586 (23.09%)	782 (17.70%)	760 (38.58%)	<0.001
ICU los, (d)	6.22 [4.13, 10.94]	5.44 [3.94, 8.94]	7.22 [4.66, 12.90]	6.43 [4.11, 11.35]	5.52 [3.91, 9.18]	8.67 [5.19, 14.41]	<0.001
ICU outcome, (%)	2337 (14.54%)	306 (8.11%)	638 (18.92%)	352 (13.87%)	437 (9.89%)	604 (30.66%)	<0.001
Hos los, (d)	12.03 [7.64, 19.84]	10.76 [7.14, 16.99]	13.65 [8.28, 21.52]	11.84 [7.59, 19.68]	11.12 [7.33, 18.45]	14.90 [8.65, 24.69]	<0.001
Hos outcome, (%)	3260 (20.29%)	459 (12.17%)	894 (26.51%)	491 (19.35%)	669 (15.15%)	747 (37.92%)	<0.001
